# Supplementary material
Source: PubMed Central journal article supplement (PMC2646817)
Supplement: NIHMS78262-supplement-1.pdf [file NIHMS78262-supplement-1.pdf]

**Supporting Information for**

**Small-Molecule Fluorescent Sensors for Investigating Zinc Metalloneurochemistry**

Elizabeth M. Nolan and Stephen J. Lippard\*

*Department of Chemistry, Massachusetts Institute of Technology, Cambridge, MA 02139*

This Supporting Information includes:

Table S1: Spectroscopic and Thermodynamic Data

Table S2: Kinetic Data

**Table S1.** Spectroscopic and Thermodynamic Data<sup>a</sup>

|                           | Absorption<br>$\lambda$ (nm), $\epsilon \times 10^4$ (M <sup>-1</sup> cm <sup>-1</sup> ) |           | Emission<br>$\lambda$ (nm), $\Phi^b$ |           | pK <sub>a1</sub> <sup>c</sup> | pK <sub>a2</sub> <sup>d</sup> | pK <sub>a3</sub> <sup>e</sup> | K <sub>d</sub> <sup>f</sup> | ~DR <sup>g</sup> | Ref.   |
|---------------------------|------------------------------------------------------------------------------------------|-----------|--------------------------------------|-----------|-------------------------------|-------------------------------|-------------------------------|-----------------------------|------------------|--------|
|                           | Unbound                                                                                  | Zn(II)    | Unbound                              | Zn(II)    |                               |                               |                               |                             |                  |        |
| ZP1                       | 515, 7.9                                                                                 | 507, 8.4  | 531, 0.38                            | 527, 0.87 | 7.0                           | 4.0                           |                               | 0.7 ± 0.1 nM                | 2.5              | 22,46  |
| ZP2                       | 498, 4.4                                                                                 | 490, 5.3  | 522, 0.25                            | 517, 0.92 | 9.4                           | n.o.                          | 3.9                           | 0.5 ± 0.1 nM                | 4                | 22     |
| ZP3                       | 502, 7.5                                                                                 | 492, 8.5  | 521, 0.15                            | 516, 0.92 | 6.8                           | 4.0                           | 2.0                           | 0.7 ± 0.1 nM                | 6                | 23, 46 |
| ZP4                       | 506, 6.1                                                                                 | 495, 6.7  | 521, 0.06                            | 515, 0.34 | 7.2                           | 10.0                          | 4.0                           | 0.65 ± 0.1 nM               | 4.4              | 25     |
| ZP5                       | 504, 8.3                                                                                 | 495, 9.1  | 520, 0.29                            | 517, 0.48 | 9.6                           | 10.9                          | 4.7                           | 0.50 ± 0.1 nM               | 1.6              | 26     |
| ZP6                       | 506, 8.9                                                                                 | 495, 9.8  | 519, 0.10                            | 517, 0.34 | 6.3                           | 11.2                          | 4.7                           | 0.50 ± 0.1 nM               | 4                | 26     |
| ZP7                       | 505, 6.8                                                                                 | 495, 7.7  | 521, 0.04                            | 517, 0.05 | 6.9                           | n.o.                          | 4.6                           | n.d.                        | 1                | 26     |
| ZP8                       | 500, 8.1                                                                                 | 489, 7.8  | 516, 0.03                            | 510, 0.35 | 6.5                           | n.o.                          | 3.8                           | 0.60 ± 0.1 nM               | 11               | 26     |
| ZP9                       | 505, 5.1                                                                                 | 495, 4.4  | 526, 0.02                            | 521, 0.41 | 7.2                           | n.o.                          | 5.0                           | 0.69 ± 0.04 μM              | 12               | 29     |
| ZP10                      | 506, 5.4                                                                                 | 497, 4.5  | 523, 0.08                            | 516, 0.32 | 7.0                           | n.o.                          | 4.8                           | 1.9 ± 0.2 μM                | 7                | 29     |
| ZPF1                      | 533, 9.9                                                                                 | 525, 12.0 | 547, 0.11                            | 544, 0.55 | 6.9                           | 4.2                           | 1.8                           | 0.9 ± 0.1 nM                | 6                | 23     |
| ZPCl1                     | 534, 9.7                                                                                 | 527, 12.0 | 550, 0.22                            | 549, 0.50 | 7.0                           | 4.3                           | 1.9                           | 1.1 ± 0.1 nM                | 2.5              | 23     |
| ZPBr1                     | 534, 4.5                                                                                 | 528, 8.6  | 549, 0.25                            | 547, 0.36 | 7.3                           | 4.5                           | 2.1                           | 0.9 ± 0.1 nM                | 2.2              | 23     |
| ZPF3                      | 520, 8.7                                                                                 | 510, 9.3  | 537, 0.14                            | 533, 0.60 | 6.7                           | 4.0                           | 1.9                           | 0.8 ± 0.1 nM                | 5                | 23     |
| ZP1(5-CO <sub>2</sub> H)  | 520, 8.1                                                                                 | 509, 8.8  | 0.17                                 | 0.62      | 7.1                           | 3.7                           | 1.6                           | 0.22 ± 0.04 nM              | 8                | 24     |
| ZP1(5-CO <sub>2</sub> Et) | 517, 6.6                                                                                 | 506, 7.1  | 0.14                                 | 0.58      | 7.0                           | 4.0                           | 1.5                           | 0.26 ± 0.03 nM              | 8                | 24     |
| ZP1(6-CO <sub>2</sub> H)  | 516, 7.6                                                                                 | 506, 8.1  | 531, 0.21                            | 528, 0.63 | 7.1                           | 4.1                           | 2.1                           | 0.16 ± 0.02 nM              | 8                | 24     |
| ZP1(6-CO <sub>2</sub> Et) | 519, 6.1                                                                                 | 509, 7.2  | 0.13                                 | 0.67      | 7.0                           | 4.0                           | 2.1                           | 0.37 ± 0.04 nM              | 8                | 24     |

|                     |           |           |             |           |     |      |     |                |     |    |
|---------------------|-----------|-----------|-------------|-----------|-----|------|-----|----------------|-----|----|
| Me <sub>2</sub> ZP1 | 515, 7.4  | 505, 8.06 | 528, 0.18   | 524, 0.61 | 7.8 | 4.8  | 1.7 | 3.3 ± 0.2 nM   | 4   | 28 |
| Me <sub>4</sub> ZP1 | 516, 5.6  | 506, 4.74 | 529, 0.17   | 527, 0.35 | 7.3 | 4.1  | 1.5 | 0.63 ± 0.05 μM | 2.5 | 28 |
| ZAP1                | 506, 8.3  | 500, 5.46 | 525, 0.82   | n.d.      | 8.3 | n.o. | 2.0 | 10.2 ± 1.4 μM  | 1   | 35 |
| ZAP2                | 508, 7.8  | 503, 5.78 | 527, 0.74   | n.d.      | 8.3 | n.o. | 2.7 | 109 ± 20 μM    | 1   | 35 |
| ZAP3                | 510, 8.04 | 504, 5.68 | 527, 0.52   | n.d.      | 7.9 | n.o. | 3.2 | 9.3 ± 0.7 μM   | 1   | 35 |
| ZS1                 | 510, 8.39 | 501, 7.52 | 531, 0.50   | 526, 0.70 | 7.7 | n.o. | 2.0 | n.d.           | 1.4 | 36 |
| ZS2                 | 499, 6.69 | 489, 6.76 | 523, 0.39   | 516, 0.69 | 7.7 | n.o. | 2.7 | n.d.           | 2   | 36 |
| ZS3                 | 500, 8.69 | n.d.      | 525, 0.71   | n.d.      | 9.3 | n.o. | 4.5 | n.d.           | 1   | 36 |
| ZS4                 | 507, 8.11 | 495, n.d. | 522, 0.12   | 520, 0.50 | 7.6 | n.o. | 5.1 | n.d.           | 4.5 | 36 |
| ZS5                 | 497, 3.3  | 490, 4.2  | 522, 0.36   | 517, 0.80 | 8.0 | n.o. | 4.6 | 1.5 ± 0.2 μM   | 4.6 | 37 |
| ZS6                 | 515, n.d. | 505, n.d. | 533, 0.44   | 527, 0.64 | 7.8 | n.o. | 3.3 | n.d.           | 3.3 | 37 |
| ZS7                 | 500, 6.2  | 490, 6.6  | 524, 0.25   | 518, 0.79 | 7.0 | n.o. | 2.0 | 3.7 ± 0.2 μM   | 2.7 | 37 |
| ZSF6                | 532, 6.3  | 522, 7.0  | 549, 0.19   | 545, 0.63 | 7.1 | n.o. | 2.7 | 4.6 ± 0.2 μM   | 2.0 | 37 |
| ZSF7                | 521, 6.2  | 511, 7.0  | 535, 0.24   | 527, 0.68 | 6.9 | n.o. | 2.5 | 5.0 ± 0.3 μM   | 2.5 | 37 |
| QZ1                 | 505, 6.89 | 498, 6.98 | 524, 0.024  | 524, 0.78 | 6.1 | n.o. | 5.0 | 33 ± 2 μM      | 42  | 33 |
| QZ2                 | 499, 3.72 | 489, 3.36 | ~520, 0.005 | 518, 0.70 | 7.0 | n.o. | 4.9 | 41 ± 3 μM      | 150 | 33 |

<sup>a</sup>Measurements were performed at pH 7 (50 mM PIPES, 100 mM KCl). Thermodynamic data are derived from fluorescence measurements (see footnote, main text). The references correspond to those in the main text. <sup>b</sup>Fluorescein in 0.1N NaOH was used as the standard. <sup>c</sup>The p*K*<sub>a</sub> value corresponding to a fluorescence increase when going from high to low pH. <sup>d</sup>In some instances, a second p*K*<sub>a</sub> transition corresponding to a fluorescence increase is observed when going from high to low pH. <sup>e</sup>The p*K*<sub>a</sub> value associated with fluorescence quenching when moving from high to low pH. The ZP1 are revised from those in ref. 23 (B. A. Wong, personal communication). <sup>f</sup>The *K*<sub>d</sub> value is for the Zn(II) binding event observable by fluorescence titration for sensors with two chelates. The ZAP *K*<sub>d</sub> values were determined by using optical absorption spectroscopy. <sup>g</sup>DR is the dynamic range, or the increase in brightness ( $\Phi \times \epsilon$ ), that results from Zn(II) coordination.

**Table S2.** Kinetic and Thermodynamic Parameters for Zn(II) Binding to ZP, ZS and QZ Sensors<sup>a</sup>

|      | $k_{\text{on}}(\text{M}^{-1}\text{s}^{-1})^b$<br>4.3 °C | $k_{\text{on}}(\text{M}^{-1}\text{s}^{-1})^c$<br>25 °C | $K_{\text{d}}^d$<br>4.3 °C | $K_{\text{d}}^e$<br>25 °C | $k_{\text{off}}(\text{s}^{-1})^f$<br>4.3 °C | $\sim k_{\text{off}}(\text{s}^{-1})^g$<br>25 °C | $\Delta H^\ddagger^h$<br>(kcal/mol) | $\Delta S^\ddagger^h$<br>(cal/mol-K) |
|------|---------------------------------------------------------|--------------------------------------------------------|----------------------------|---------------------------|---------------------------------------------|-------------------------------------------------|-------------------------------------|--------------------------------------|
| ZP1  | $(6.3 \pm 0.1) \times 10^5$                             | $(3.3 \pm 0.4) \times 10^6$                            |                            | 0.7 ± 0.1 nM              |                                             | $(2.3 \pm 0.4) \times 10^{-3}$                  | 12.5 ± 0.1                          | 13.2 ± 0.3                           |
| ZP3  | $(7.8 \pm 0.1) \times 10^5$                             | $(4.3 \pm 0.3) \times 10^6$                            |                            | 0.7 ± 0.1 nM              |                                             | $(2.9 \pm 0.4) \times 10^{-3}$                  | 11.6 ± 0.2                          | 10.7 ± 0.7                           |
| ZP4  | $(8.5 \pm 0.4) \times 10^5$                             | $(5.2 \pm 0.1) \times 10^6$                            |                            | 0.65 ± 0.1 nM             |                                             | $(3.4 \pm 0.5) \times 10^{-3}$                  | 12.2 ± 0.3                          | 13.1 ± 0.1                           |
| ZP9  | $(3.00 \pm 0.09) \times 10^5$                           | $(2.2 \pm 0.1) \times 10^6$                            |                            | 0.69 ± 0.04 μM            |                                             | 1.5 ± 0.1                                       | 14.4 ± 0.1                          | 18.3 ± 0.9                           |
| ZP10 | $(2.04 \pm 0.04) \times 10^5$                           | $(2.1 \pm 0.1) \times 10^6$                            |                            | 1.9 ± 0.2 μM              |                                             | 4.0 ± 0.1                                       | 14.6 ± 0.1                          | 20.3 ± 2.0                           |
| ZS5  | $(3.6 \pm 0.2) \times 10^5$                             | $(2.2 \pm 0.1) \times 10^6$                            |                            | 1.5 ± 0.2 μM              |                                             | 3.3                                             | 13.3 ± 0.1                          | 15.2 ± 0.2                           |
| ZS6  | $(3.7 \pm 0.1) \times 10^5$                             | $(2.1 \pm 0.1) \times 10^6$                            |                            | n.d.                      |                                             | n.d.                                            | 12.9 ± 0.4                          | 14.0 ± 0.7                           |
| ZS7  | $(5.9 \pm 0.1) \times 10^5$                             | $(3.0 \pm 0.1) \times 10^6$                            |                            | 3.7 ± 0.2 μM              |                                             | 11                                              | 12.5 ± 0.3                          | 12.9 ± 1.3                           |
| ZSF6 | $(3.3 \pm 0.1) \times 10^5$                             | $(1.8 \pm 0.1) \times 10^6$                            |                            | 4.6 ± 0.2 μM              |                                             | 8.3                                             | 12.6 ± 0.2                          | 12.4 ± 0.9                           |
| ZSF7 | $(5.0 \pm 0.1) \times 10^5$                             | $(2.7 \pm 0.1) \times 10^6$                            |                            | 5.0 ± 0.3 μM              |                                             | 13.5                                            | 12.6 ± 0.2                          | 13.0 ± 0.7                           |
| QZ1  | $(3.1 \pm 0.2) \times 10^6$                             | $(3.7 \pm 0.2) \times 10^7$                            | 48 ± 3 μM                  | 33 ± 2 μM                 | $1.5 \pm 0.3 \times 10^2$                   | $1.2 \pm 0.1 \times 10^3$                       | 10.7 ± 0.1                          | 12.1 ± 0.1                           |
| QZ2  | $(3.9 \pm 0.3) \times 10^6$                             | $(4.5 \pm 0.3) \times 10^7$                            | 41 ± 3 μM                  |                           | $1.6 \pm 0.2 \times 10^2$                   |                                                 | 10.7 ± 0.1                          | 12.4 ± 0.1                           |

<sup>a</sup>All measurements were made at pH 7 (50 mM PIPES, 100 mM KCl). <sup>b</sup>Experimentally determined values for  $k_{\text{on}}$  at  $4.3 \pm 0.1$  °C. <sup>c</sup>Experimentally determined  $k_{\text{on}}$  for ZP and ZS sensors at  $25 \pm 1$  °C. The  $k_{\text{on}}$  values for QZ were estimated by extrapolation of the Eyring plots (E. M. Nolan, Ph. D. Thesis, MIT, 2006, Figure 7.13). <sup>d</sup>Dissociation constants for QZ1 and QZ2 calculated from stopped-flow kinetic data obtained at  $4.3 \pm 0.1$  °C. <sup>e</sup>Dissociation constants for ZP, ZS and QZ1 obtained experimentally by fluorimetric titration at  $25 \pm 1$  °C. See Table S1 for references. <sup>f</sup>Experimentally determined  $k_{\text{off}}$  at  $4.3 \pm 0.1$  °C. <sup>g</sup>Calculated  $k_{\text{off}}$  for ZP and at  $25 \pm 1$  °C. <sup>h</sup>Activation parameters were determined over a temperature range of ~4 to ~20 °C for QZ and from ~4 to ~40 °C for ZP and ZS.
